# Supplementary material
Source: publisher site journal article supplement (https://www.spandidos-publications.com/1165/downloadSupplementary)
Supplement: Supplementary file 1 [file downloadSupplementary]

**Table SVI. KEGG Pathway Functional enrichment list.**

| <b>ID</b> | <b>Description</b>                                   | <b>P-value</b>         | <b>Count</b> |
|-----------|------------------------------------------------------|------------------------|--------------|
| hsa04080  | Neuroactive ligand-receptor interaction              | 2.25x10 <sup>-11</sup> | 34           |
| hsa04510  | Focal adhesion                                       | 9.86x10 <sup>-05</sup> | 16           |
| hsa04974  | Protein digestion and absorption                     | 0.000155               | 10           |
| hsa04020  | Calcium signaling pathway                            | 0.000237               | 15           |
| hsa04151  | PI3K-Akt signaling pathway                           | 0.00024                | 22           |
| hsa04927  | Cortisol synthesis and secretion                     | 0.000352               | 8            |
| hsa04512  | ECM-receptor interaction                             | 0.000518               | 9            |
| hsa04270  | Vascular smooth muscle contraction                   | 0.000909               | 11           |
| hsa04934  | Cushing syndrome                                     | 0.001031               | 12           |
| hsa05031  | Amphetamine addiction                                | 0.002381               | 7            |
| hsa05033  | Nicotine addiction                                   | 0.004321               | 5            |
| hsa04925  | Aldosterone synthesis and secretion                  | 0.005101               | 8            |
| hsa04024  | cAMP signaling pathway                               | 0.005547               | 13           |
| hsa00590  | Arachidonic acid metabolism                          | 0.007084               | 6            |
| hsa05410  | Hypertrophic cardiomyopathy (HCM)                    | 0.009306               | 7            |
| hsa05144  | Malaria                                              | 0.010284               | 5            |
| hsa04014  | Ras signaling pathway                                | 0.010646               | 13           |
| hsa05014  | Amyotrophic lateral sclerosis (ALS)                  | 0.012129               | 5            |
| hsa05202  | Transcriptional misregulation in cancer              | 0.012548               | 11           |
| hsa05414  | Dilated cardiomyopathy (DCM)                         | 0.013169               | 7            |
| hsa04060  | Cytokine-cytokine receptor interaction               | 0.014165               | 15           |
| hsa04010  | MAPK signaling pathway                               | 0.014573               | 15           |
| hsa04022  | cGMP-PKG signaling pathway                           | 0.015648               | 10           |
| hsa04972  | Pancreatic secretion                                 | 0.017175               | 7            |
| hsa04261  | Adrenergic signaling in cardiomyocytes               | 0.01874                | 9            |
| hsa04933  | AGE-RAGE signaling pathway in diabetic complications | 0.018996               | 7            |
| hsa04610  | Complement and coagulation cascades                  | 0.020292               | 6            |
| hsa04260  | Cardiac muscle contraction                           | 0.026564               | 6            |
| hsa04310  | Wnt signaling pathway                                | 0.029363               | 9            |
| hsa04810  | Regulation of actin cytoskeleton                     | 0.031728               | 11           |
| hsa04371  | Apelin signaling pathway                             | 0.033171               | 8            |
| hsa00830  | Retinol metabolism                                   | 0.035264               | 5            |
| hsa05032  | Morphine addiction                                   | 0.037328               | 6            |
| hsa05030  | Cocaine addiction                                    | 0.043623               | 4            |
| hsa00982  | Drug metabolism - cytochrome P450                    | 0.045887               | 5            |
| hsa05205  | Proteoglycans in cancer                              | 0.047593               | 10           |
| hsa05215  | Prostate cancer                                      | 0.048505               | 6            |
| hsa04072  | Phospholipase D signaling pathway                    | 0.048714               | 8            |
